# Supplementary material
Source: PubMed Central journal article supplement (PMC9360240)
Supplement: ajcr0012-3405-f8.pdf [file ajcr0012-3405-f8.pdf]

## SHMT2 promotes tumor growth in breast cancer

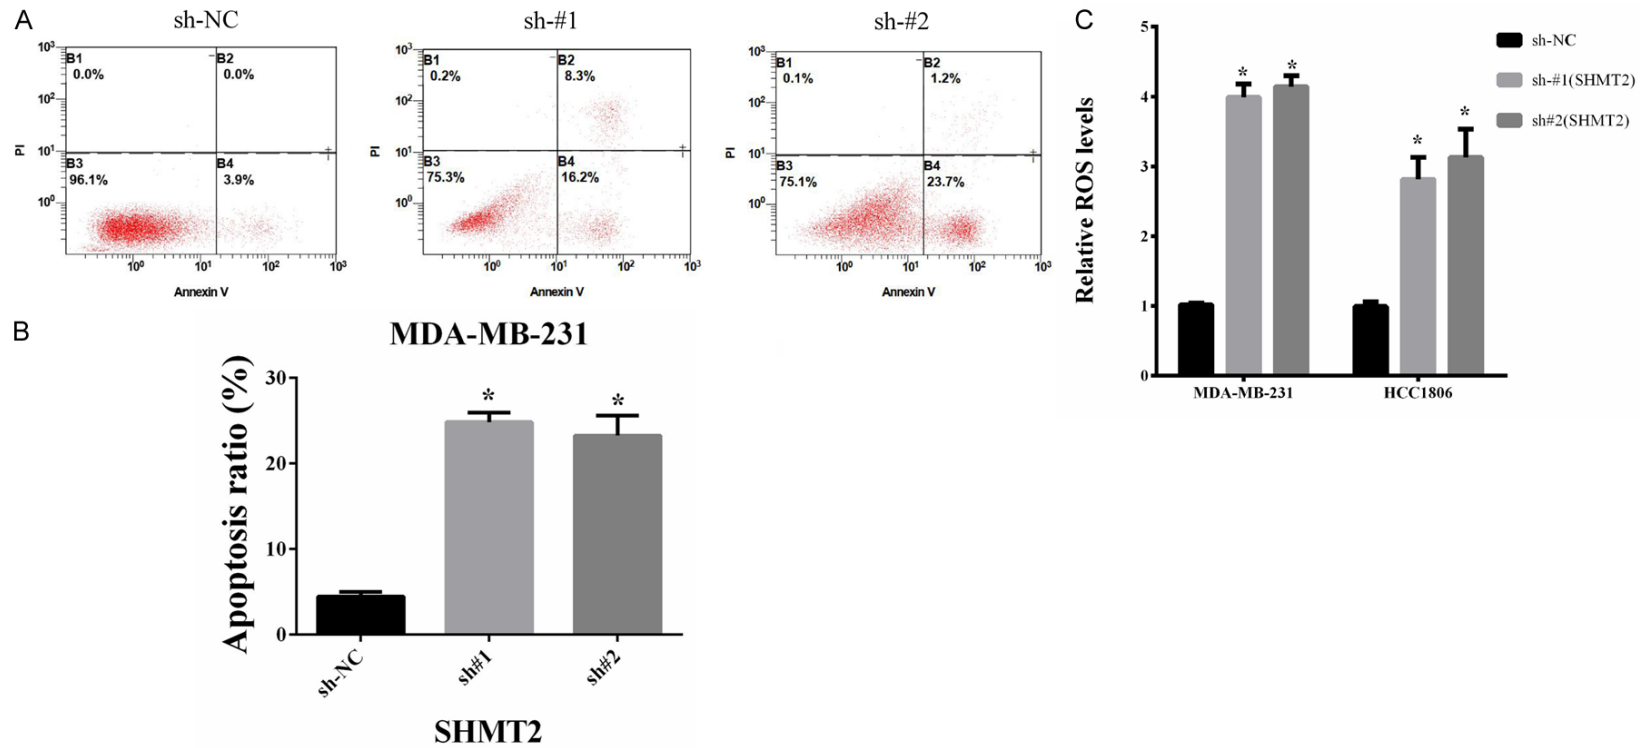

**Supplementary Figure 1.** Knocking down SHMT2 in breast cancer cells can up-regulate ROS level and apoptosis rate. A. Apoptosis rate was detected by annexin v-FITC and PI double stained cells combined with flow cytometry fluorescence separation in MDA-MB-231 and HCC1806 cell lines with SHMT2 knockdown. B. The apoptosis rate of each group was quantitatively analyzed. C. ROS level in MDA-MB-231 and HCC1806 cell lines with SHMT2 knockdown. \* $P < 0.05$ ; Student's t-test. The data are presented as the mean  $\pm$  SD.
